# Supplementary material
Source: PubMed Central journal article supplement (PMC5591038)

A

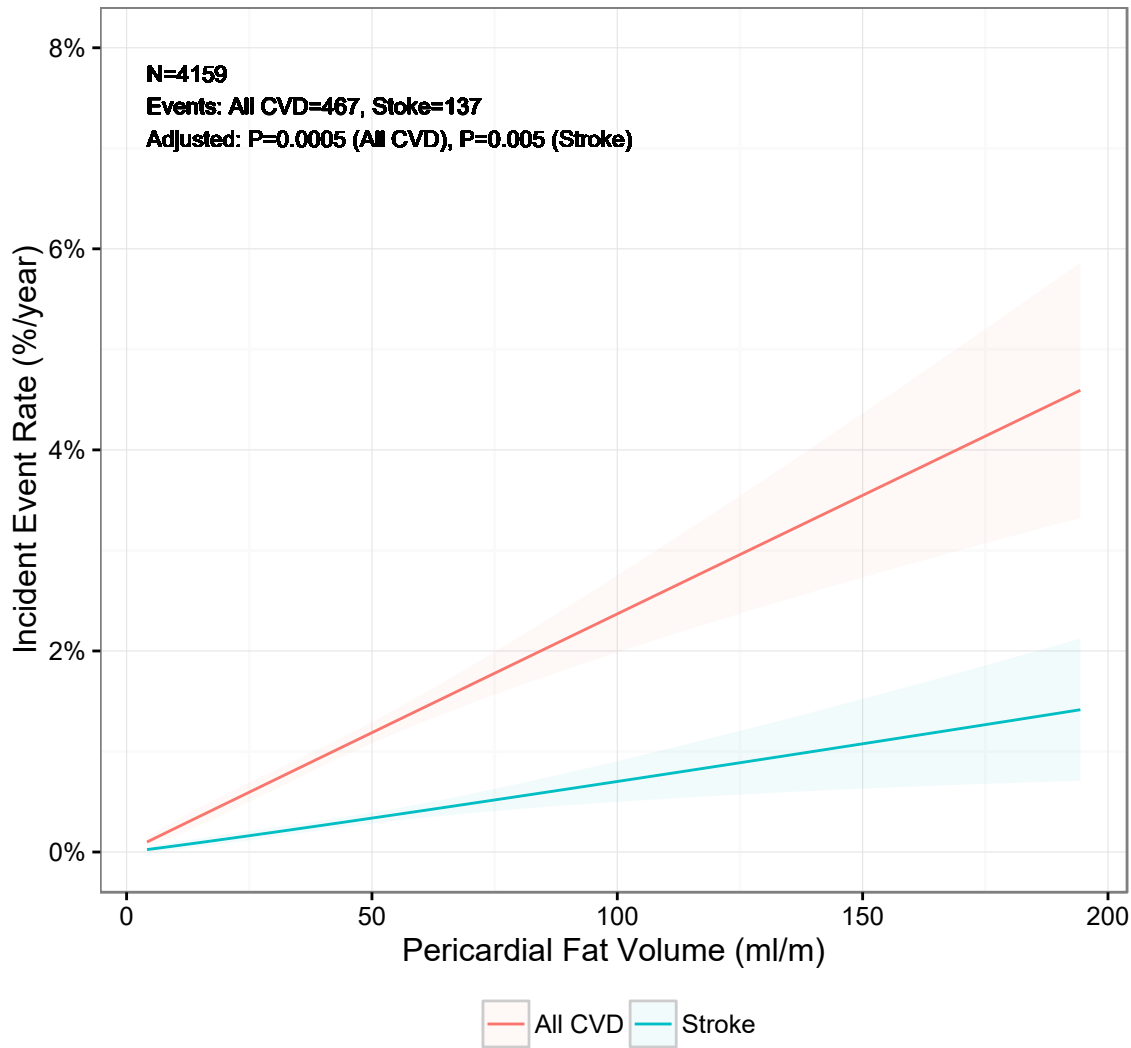

B

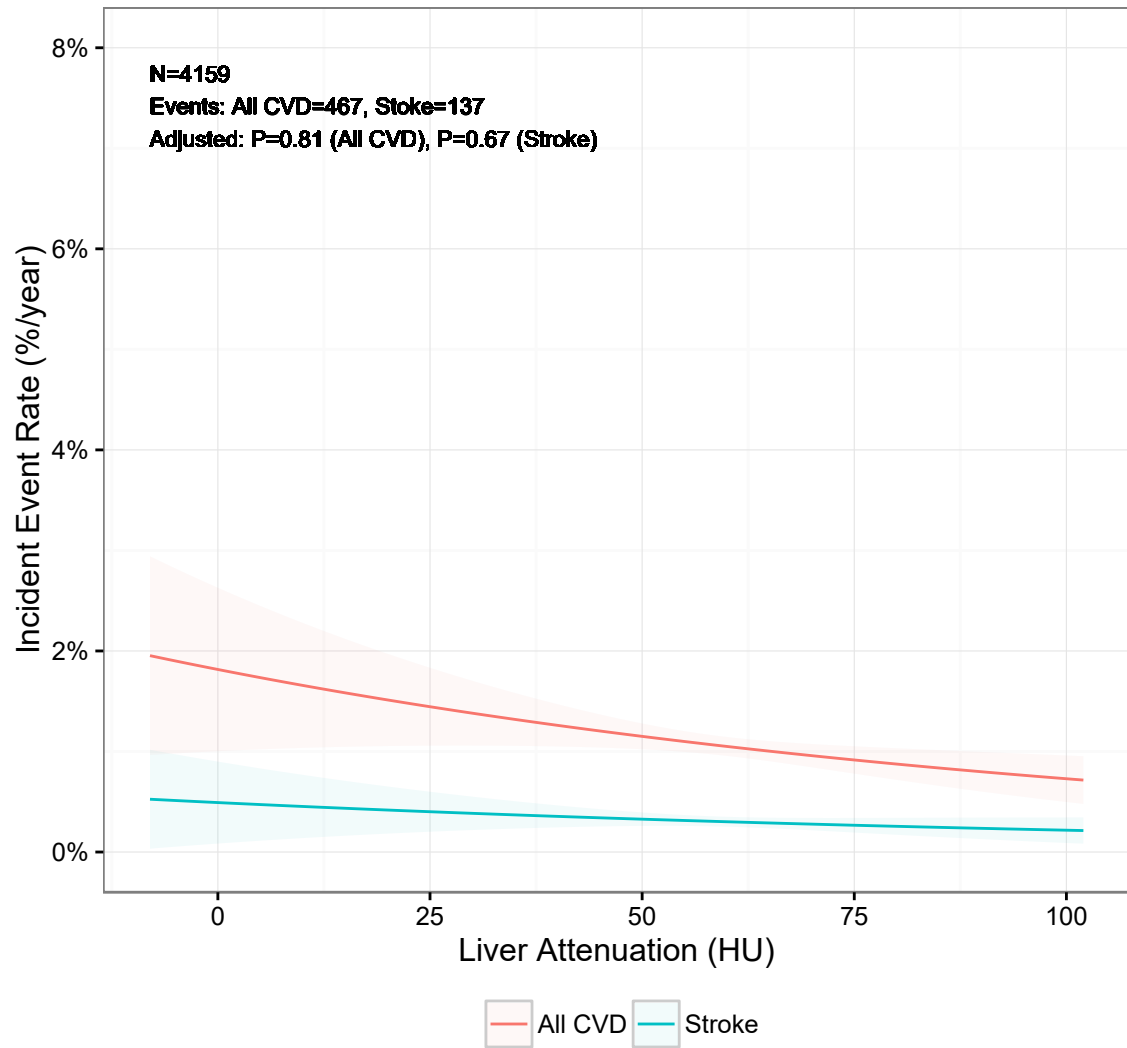

Supplement: NIHMS855159-supplement-2.pdf [file NIHMS855159-supplement-2.pdf]

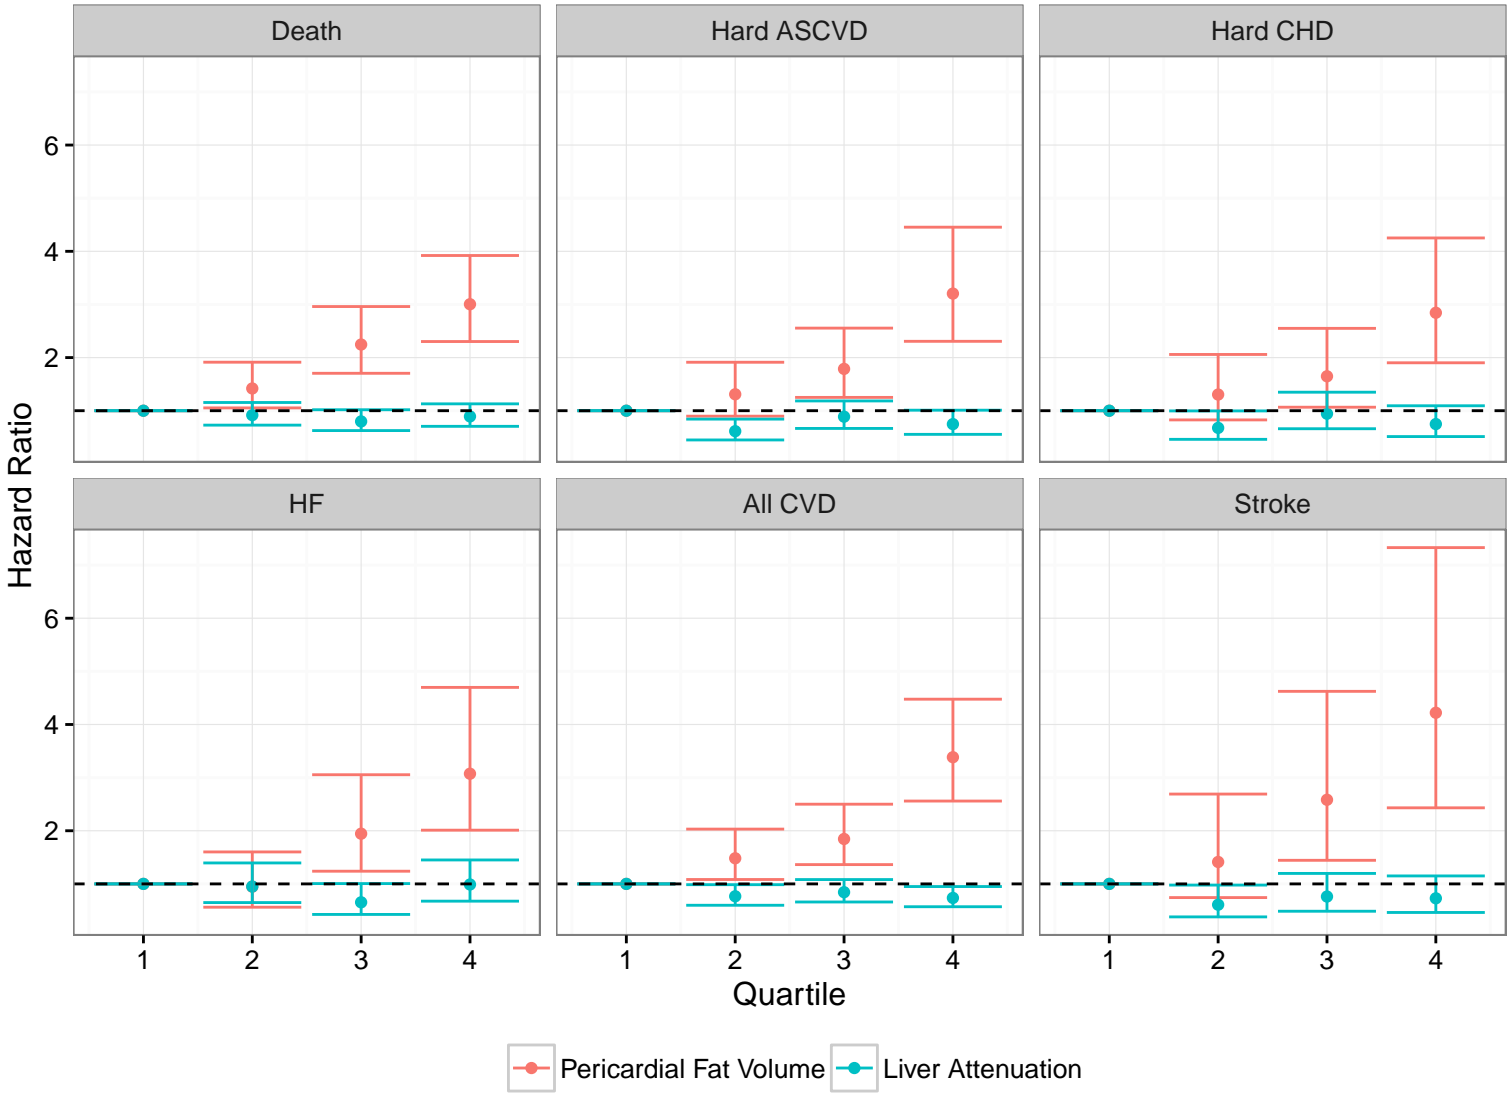

Supplement: NIHMS855159-supplement-3.pdf [file NIHMS855159-supplement-3.pdf]

**A**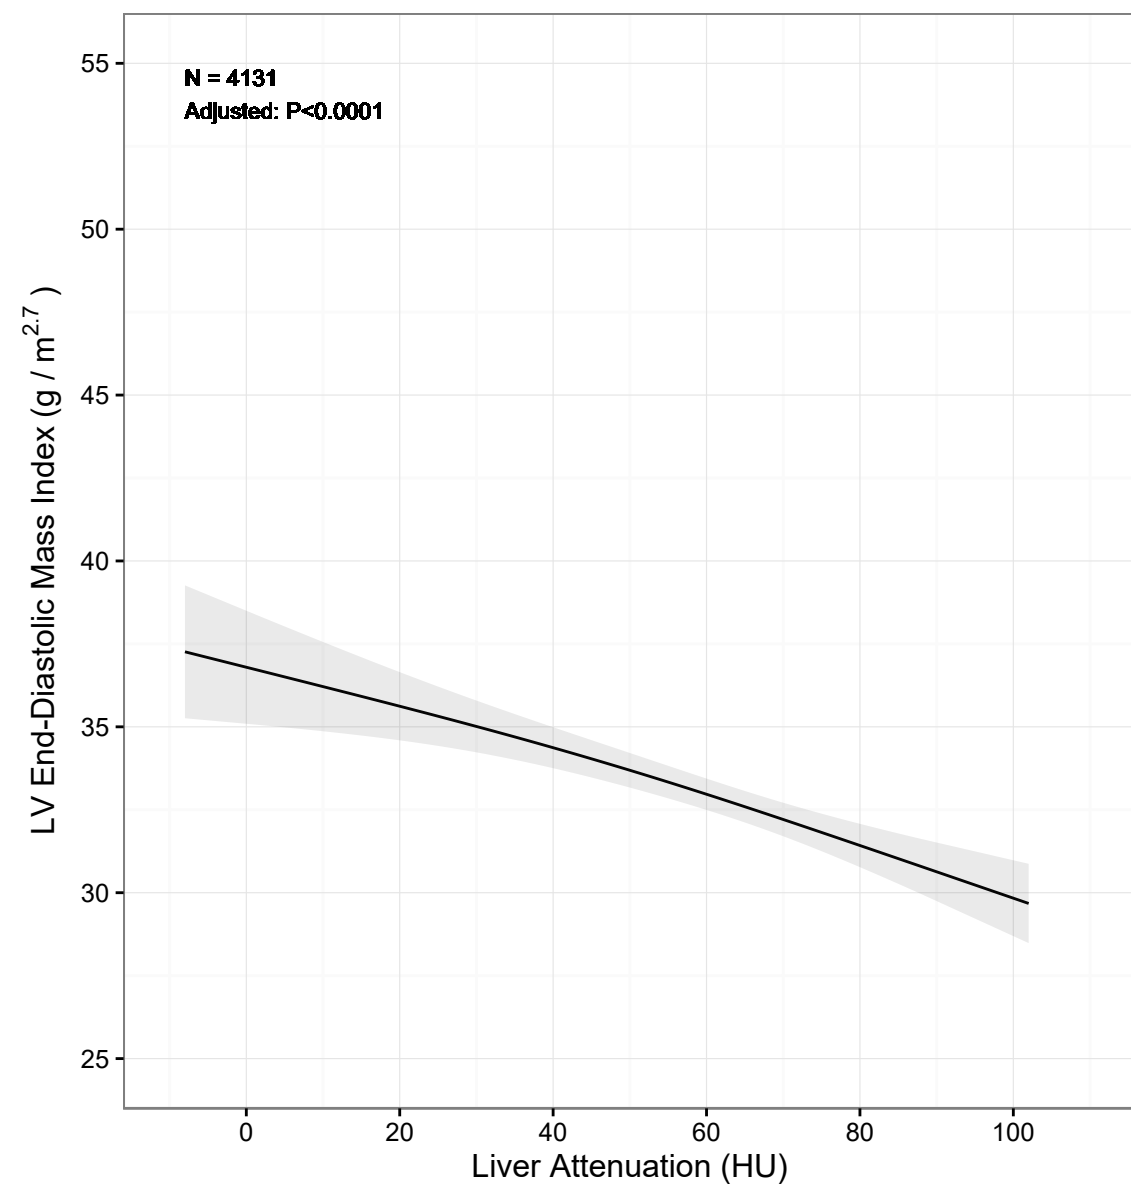**B**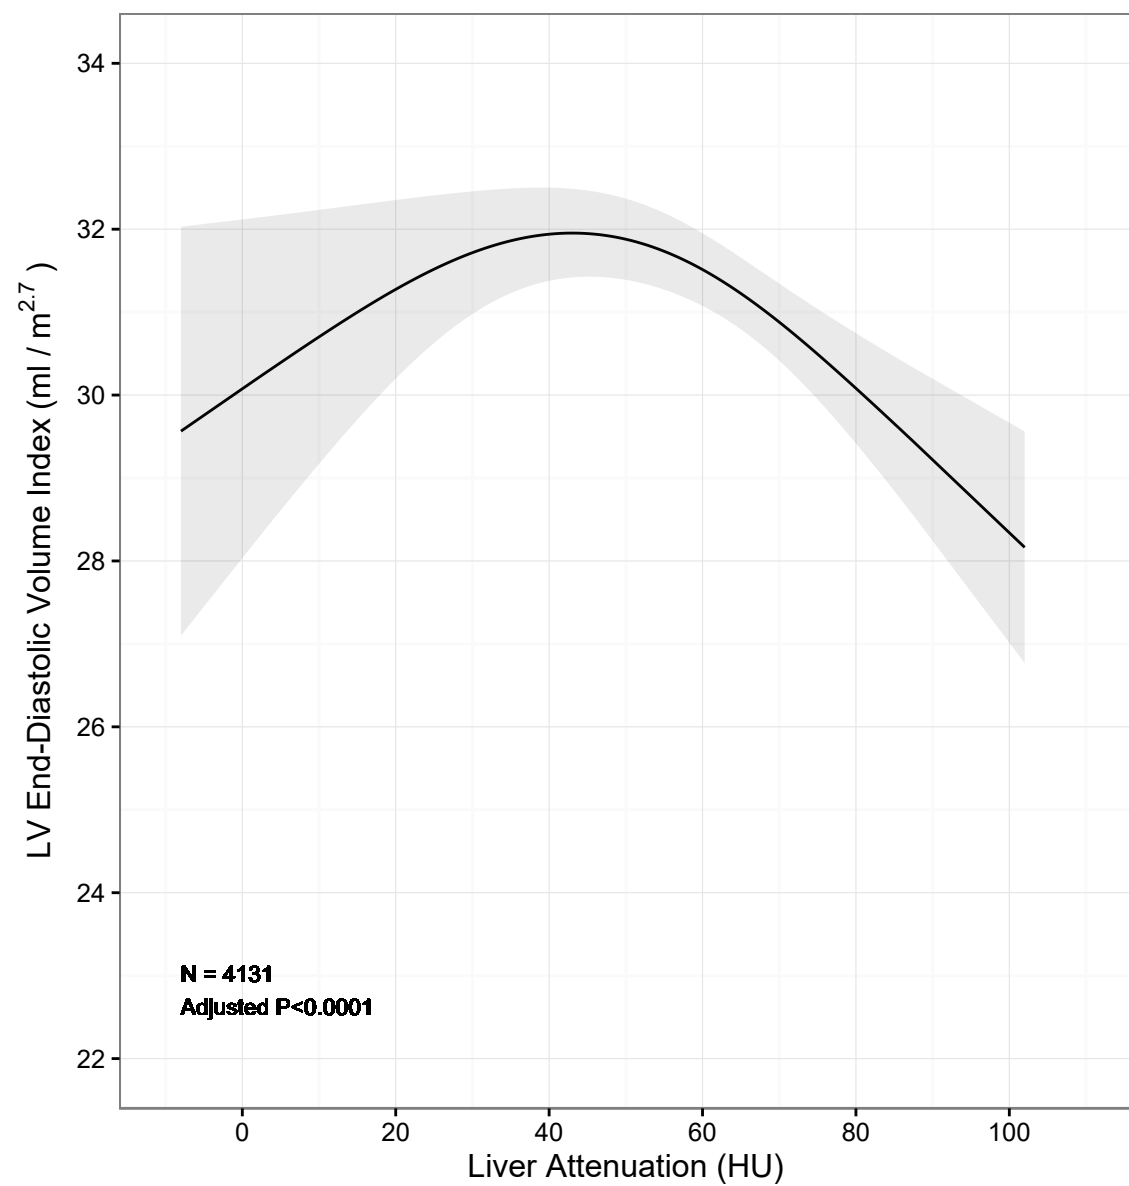**C**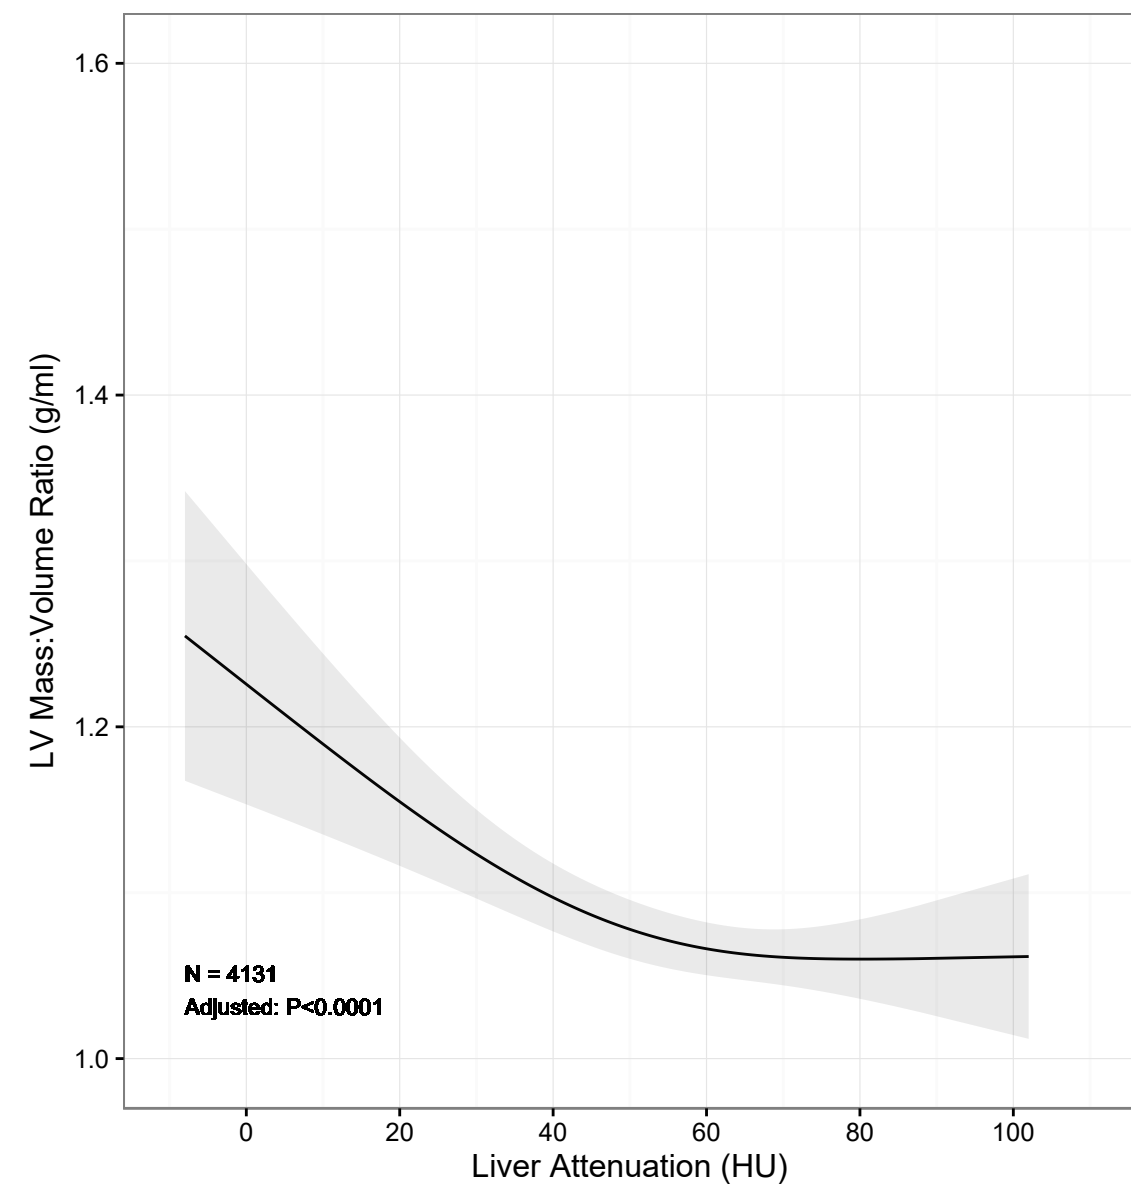**D**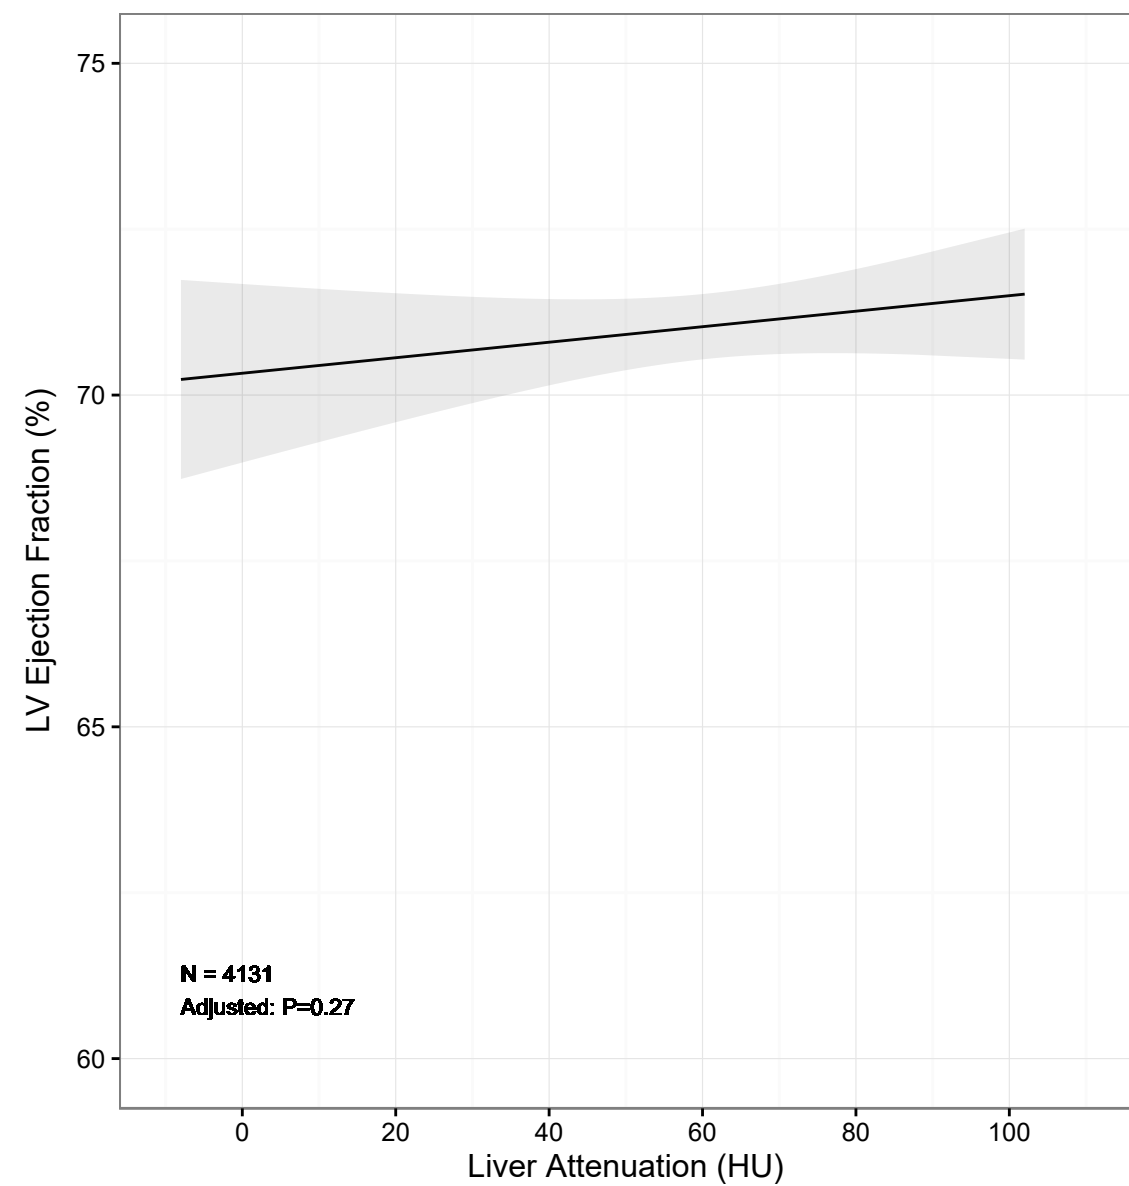

Supplement: NIHMS855159-supplement-4.pdf [file NIHMS855159-supplement-4.pdf]

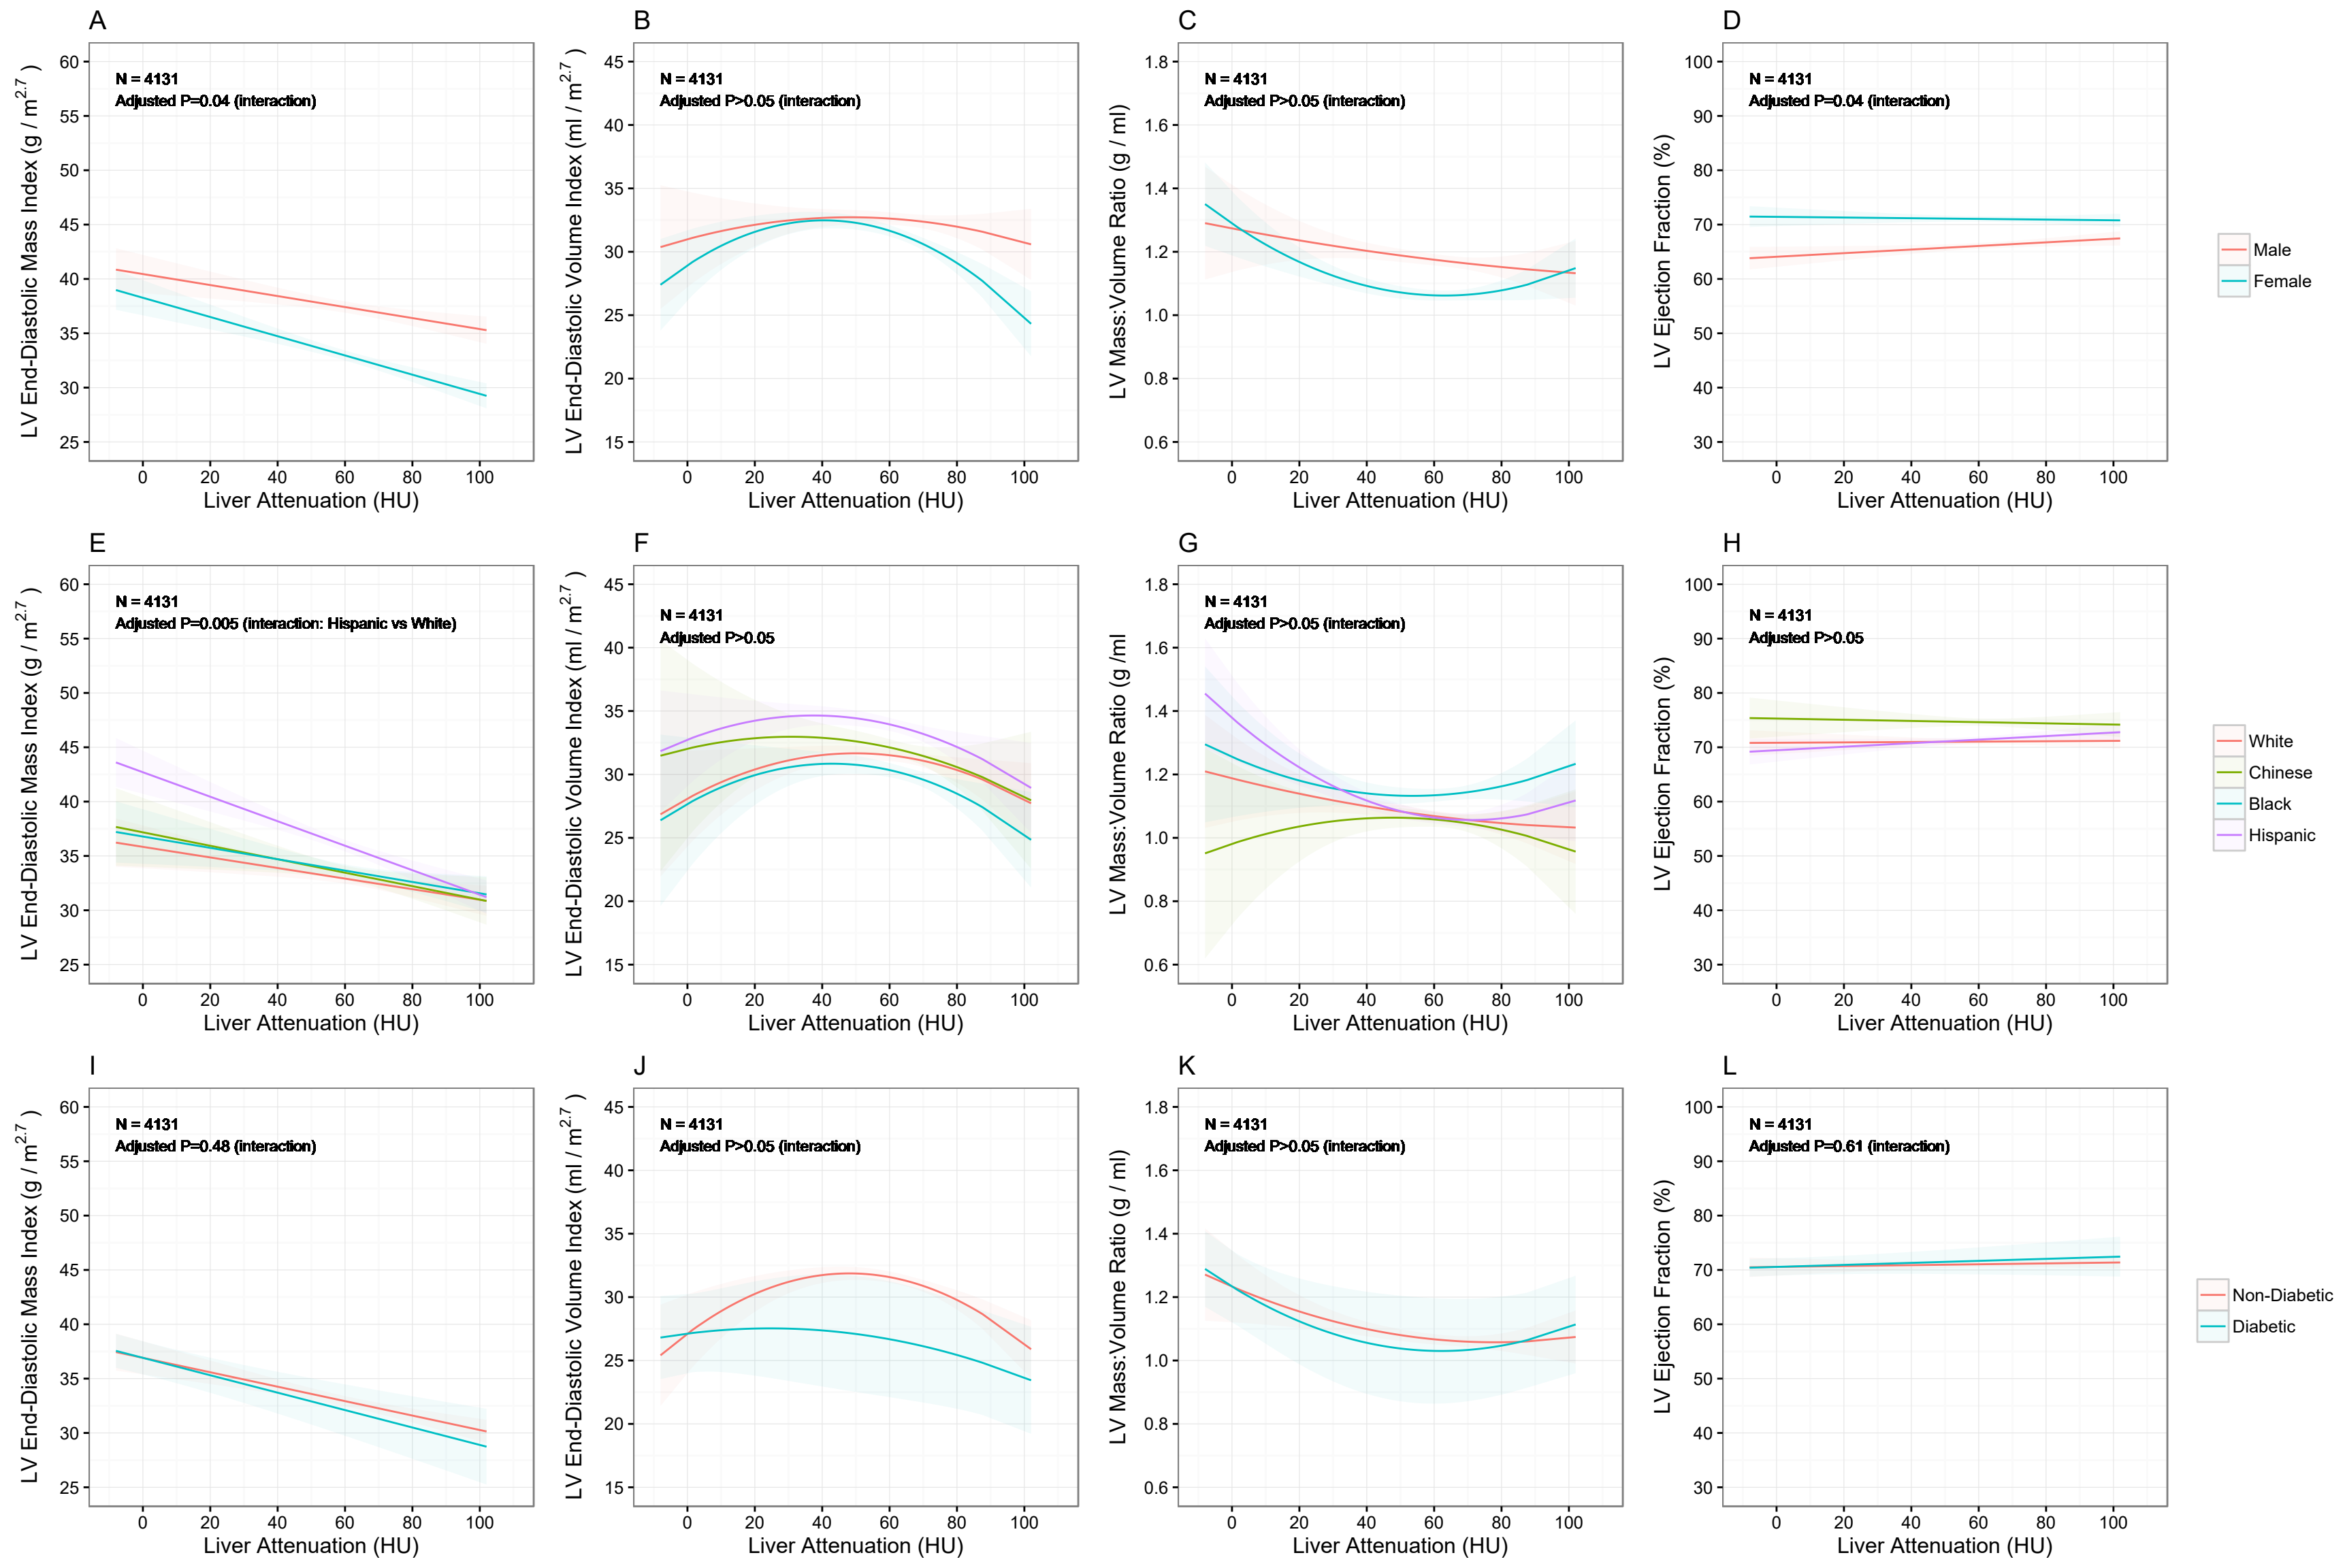

Supplement: NIHMS855159-supplement-5.pdf [file NIHMS855159-supplement-5.pdf]
